# Supplementary material
Source: publisher figshare collection journal article supplement (https://frontiersin.figshare.com/ndownloader/files/15158507)
Supplement: Supplementary file [file 15158507]

## *Supplementary Material*

### 1 Supplementary Figures

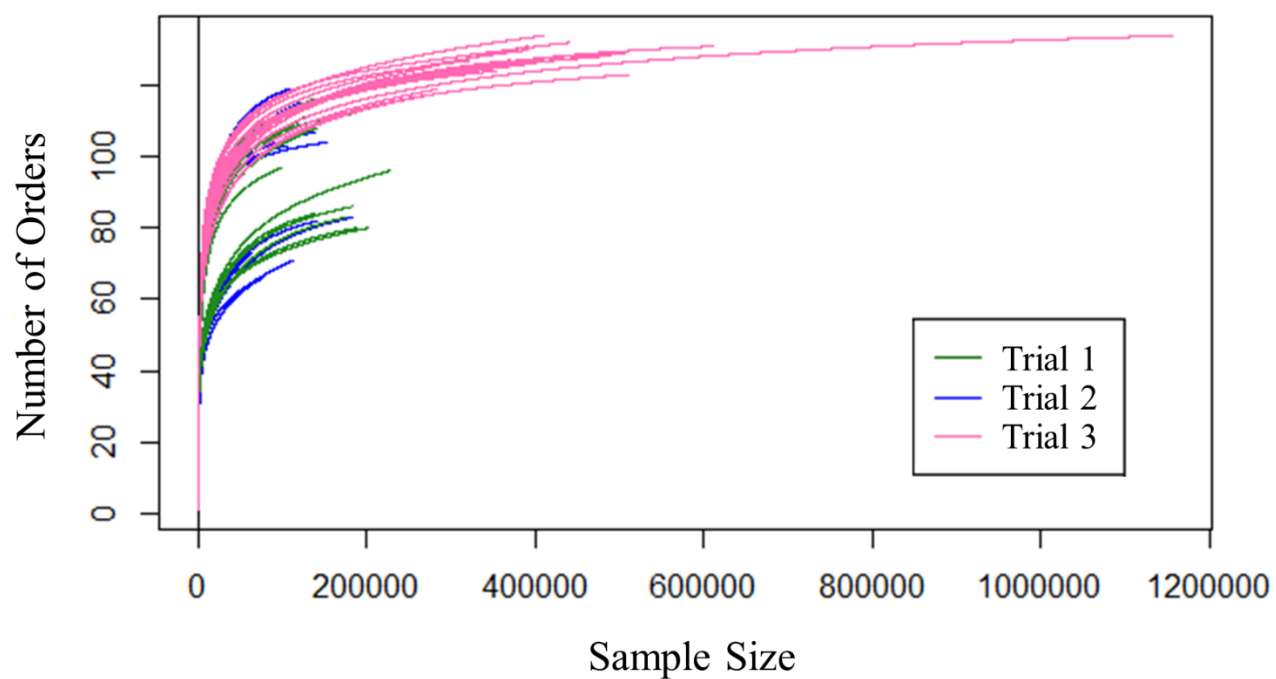

**Supplementary Figure 1.** Rarefaction curve from all water samples from all three Trials based on taxonomic classification at the order level.

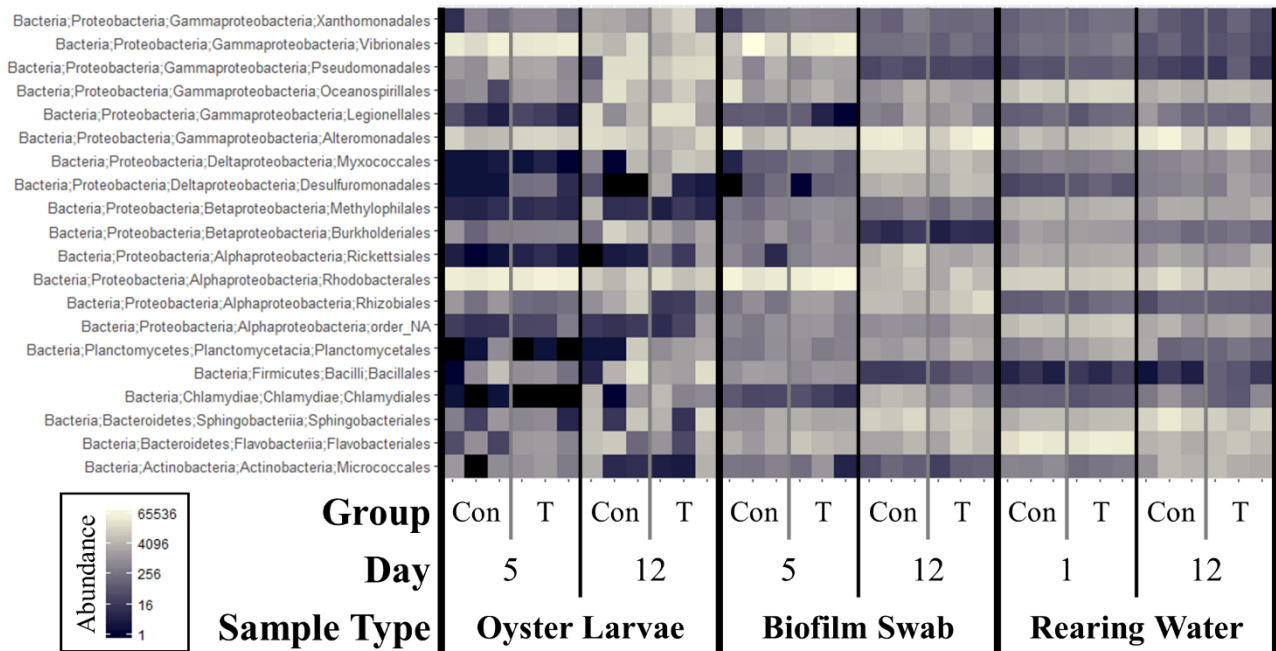

**Supplementary Figure 2.** The relative abundances of the 20 most abundant orders in oyster, swab, and water samples from Trial 1.

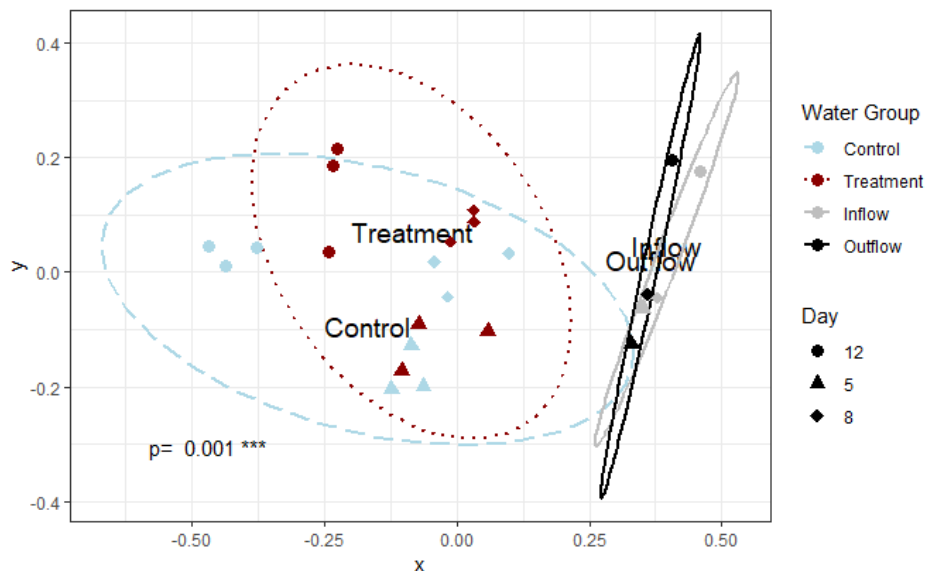

**Supplementary Figure 3.** NMDS plot visualization of Bray-Curtis beta-diversity (k=2) at the Order level by Treatment or Water Source of water samples from Trial 3. The ellipse lines show the 95% confidence interval. The water group is indicated by colors (control=light blue dashed, probiotic treatment=dark red dotted, inflow=grey solid, outflow=black solid) and sampling timepoints are indicated by symbols. The inflow water (water piped directly from the environment into the hatchery) and outflow water (inflow water UV-treated and sterilized) are significantly distinct groups, separate from the experimental samples. p-value indicates significance of groupings with adonis2 Permutational Multivariate Analysis of Variance Using Distance Matrices test.

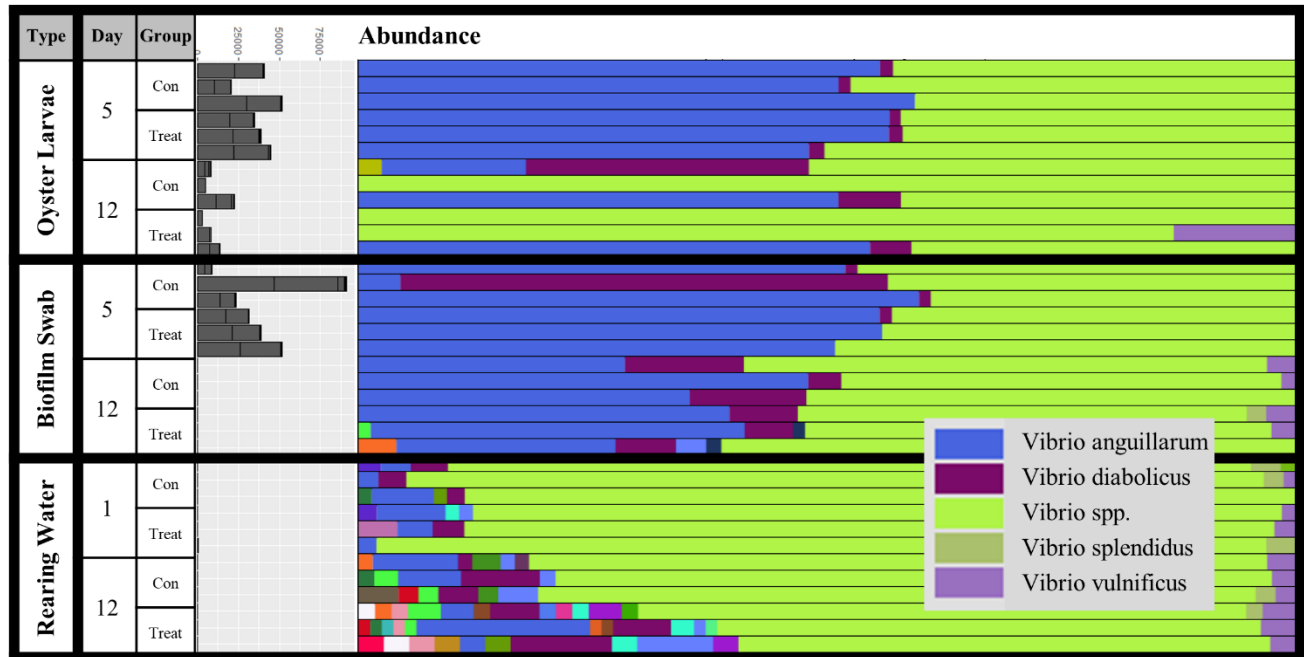

**Supplementary Figure 4.** Percent abundances of *Vibrio* species in all sample types in Trial 1. The total abundance of sequencing reads is shown in the bar graph. The structure of total *Vibrios* is different based on the sample type and time point.

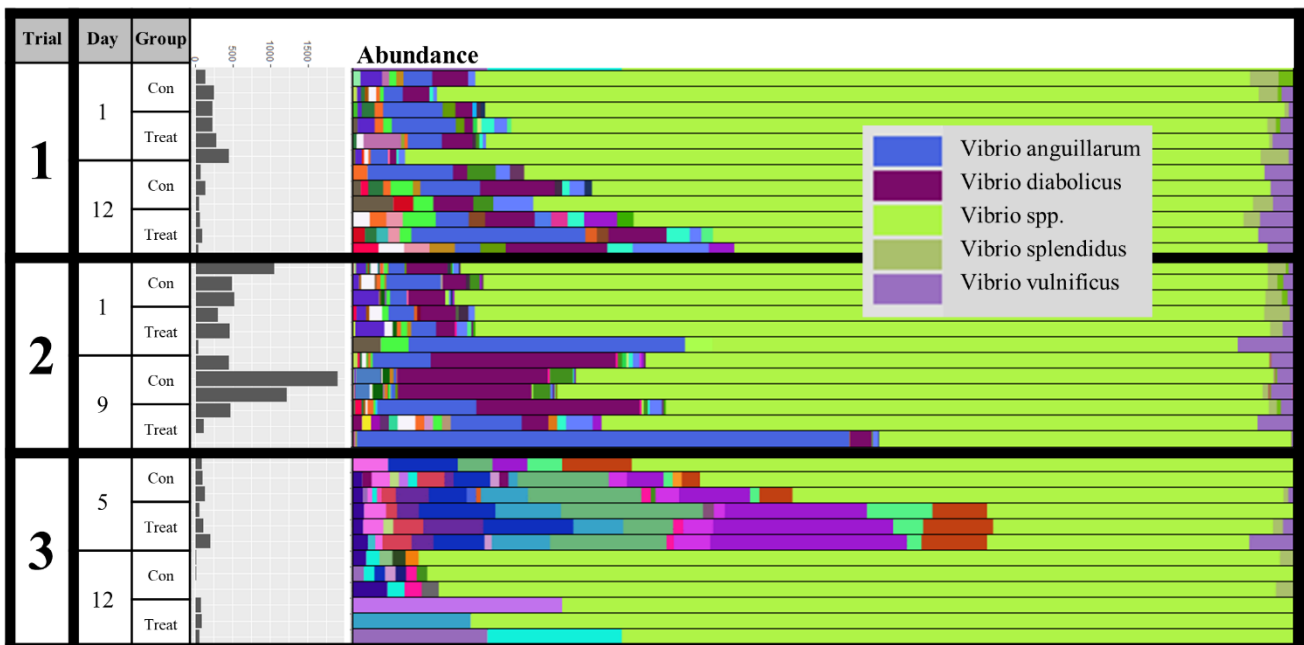

**Supplementary Figure 5.** Percent abundances of *Vibrio* species in rearing water samples from all 3 Trials. The total abundance of sequencing reads is shown in the bar graph. The structure of total *Vibrio* counts in the rearing water is different between Trials and changes over time.

## 2 Supplementary Tables

**Supplementary Table 1.** Kruskal-Wallis Rank Sum Test for percent abundances of *Proteobacteria*, *Cyanobacteria*, and *Bacteroidetes* by Sample Type from all trials.

| <All Trials – <i>Proteobacteria</i> > |    |             |           |     |
|---------------------------------------|----|-------------|-----------|-----|
|                                       | DF | Chi-Squared | P value   |     |
| Sample Type                           | 2  | 52.745      | 3.521e-12 | *** |
| Treatment                             | 1  | 0.75065     | 0.3863    |     |
| < All Trials – <i>Cyanobacteria</i> > |    |             |           |     |
|                                       | DF | Chi-Squared | P value   |     |
| Sample Type                           | 2  | 33.113      | 6.451e-08 | *** |
| Treatment                             | 1  | 0.093506    | 0.7598    |     |
| < All Trials – <i>Bacteroidetes</i> > |    |             |           |     |
|                                       | DF | Chi-Squared | P value   |     |
| Sample Type                           | 2  | 63.422      | 1.691e-14 | *** |
| Treatment                             | 1  | 0.23442     | 0.6283    |     |

**Supplementary Table 2.** Kruskal-Wallis Rank Sum Test for the Simpson's Index of Diversity values by Trial, Sample Type, Day, and/or Treatment.

| < All Trials – Simpson's Index of Diversity > |    |             |           |     |
|-----------------------------------------------|----|-------------|-----------|-----|
|                                               | DF | Chi-Squared | P value   |     |
| Trial                                         | 2  | 38.553      | 4.25e-09  | *** |
| Trial – water only                            | 2  | 24.809      | 4.099e-06 | *** |
| Type                                          | 2  | 51.932      | 5.285e-12 | *** |
| Day                                           | 2  | 9.1136      | 0.0105    | *   |
| Treatment                                     | 1  | 0.32388     | 0.5693    |     |

**Supplementary Table 3.** Kruskal-Wallis Rank Sum Test for the Simpson's Index of Diversity values by Day and Treatment in Trial 1.

| < Trial 1 - Water >         |    |             |          |    |
|-----------------------------|----|-------------|----------|----|
|                             | DF | Chi-Squared | P value  |    |
| Day                         | 1  | 0.41026     | 0.5218   |    |
| Treatment                   | 1  | 0.92308     | 0.3367   |    |
| < Trial 1 – Biofilm Swab >  |    |             |          |    |
|                             | DF | Chi-Squared | P value  |    |
| Day                         | 1  | 8.3077      | 0.003948 | ** |
| Treatment                   | 1  | 0.10256     | 0.7488   |    |
| < Trial 1 – Oyster Larvae > |    |             |          |    |
|                             | DF | Chi-Squared | P value  |    |
| Day                         | 1  | 6.5641      | 0.01041  | *  |
| Treatment                   | 1  | 0.41026     | 0.5218   |    |

**Supplementary Table 4.** Kruskal-Wallis Rank Sum Test for the Simpson's Index of Diversity values by Day and Treatment in Trial 2.

| < Trial 2 - Water >         |    |             |          |    |
|-----------------------------|----|-------------|----------|----|
|                             | DF | Chi-Squared | P value  |    |
| Day                         | 1  | 7.4103      | 0.006485 | ** |
| Treatment                   | 1  | 0.10256     | 0.7488   |    |
| < Trial 2 – Biofilm Swab >  |    |             |          |    |
|                             | DF | Chi-Squared | P value  |    |
| Day                         | 1  | 3.6923      | 0.05466  |    |
| Treatment                   | 1  | 0.10256     | 0.7488   |    |
| < Trial 2 – Oyster Larvae > |    |             |          |    |
|                             | DF | Chi-Squared | P value  |    |
| Day                         | 1  | 0           | 1        |    |
| Treatment                   | 1  | 0.6         | 0.4386   |    |

**Supplementary Table 5.** Kruskal-Wallis Rank Sum Test for the Simpson's Index of Diversity values by Day and Treatment in Trial 3.

| < Trial 3 - Water > |    |             |          |    |
|---------------------|----|-------------|----------|----|
|                     | DF | Chi-Squared | P value  |    |
| Day                 | 2  | 11.942      | 0.002552 | ** |
| Treatment           | 1  | 0.32943     | 0.566    |    |

**Supplementary Table 6.** Permutational Multivariate Analysis of Variance Using Distance Matrices (adonis2) for Bray-Curtis beta-diversity (k=2) in each Trial by Sample Type, Day, and Treatment.

| < Trial 1 – Bray-Curtis beta-diversity > |    |                |                |        |        |     |  |
|------------------------------------------|----|----------------|----------------|--------|--------|-----|--|
|                                          | DF | Sum of Squares | R <sup>2</sup> | F      | Pr(>F) |     |  |
| Type                                     | 2  | 2.0175         | 0.3053         | 7.2513 | 0.001  | *** |  |
| Residual                                 | 33 | 4.5907         | 0.6947         |        |        |     |  |
| Day (Water only)                         | 1  | 0.71911        | 0.7375         | 28.095 | 0.006  | **  |  |
| Residual                                 | 10 | 0.25596        | 0.2625         |        |        |     |  |
| Treatment (Water only)                   | 1  | 0.02426        | 0.02488        | 0.2551 | 0.719  |     |  |
| Residual                                 | 10 | 0.9508         | 0.97512        |        |        |     |  |
| < Trial 2 – Bray-Curtis beta-diversity > |    |                |                |        |        |     |  |
|                                          | DF | Sum of Squares | R <sup>2</sup> | F      | Pr(>F) |     |  |
| Type                                     | 2  | 2.7762         | 0.57915        | 20.642 | 0.001  | *** |  |
| Residual                                 | 30 | 2.0173         | 0.42085        |        |        |     |  |
| Day (Water only)                         | 1  | 0.18331        | 0.24214        | 3.195  | 0.013  | *   |  |
| Residual                                 | 10 | 0.57375        | 0.75786        |        |        |     |  |
| Treatment (Water only)                   | 1  | 0.07318        | 0.09666        | 1.07   | 0.316  |     |  |
| Residual                                 | 10 | 0.68389        | 0.90334        |        |        |     |  |
| < Trial 3 – Bray-Curtis beta-diversity > |    |                |                |        |        |     |  |
|                                          | DF | Sum of Squares | R <sup>2</sup> | F      | Pr(>F) |     |  |
| Day                                      | 1  | 0.14732        | 0.32893        | 7.8424 | 0.002  | **  |  |
| Residual                                 | 16 | 0.30056        | 0.67107        |        |        |     |  |
| Treatment                                | 1  | 0.02889        | 0.06451        | 1.1033 | 0.337  |     |  |
| Residual                                 | 16 | 0.41898        | 0.93549        |        |        |     |  |
| Water Source Group<br>(Figure S3)        | 3  | 0.37087        | 0.57173        | 8.9    | 0.001  | *** |  |
| Residual                                 | 20 | 0.27781        | 0.42827        |        |        |     |  |

**Supplementary Table 7.** Kruskal-Wallis Rank Sum Test for relative percent abundance of *Bacillales* reads in water samples per Trial by Day and Treatment Group.

| < Trial 1 - <i>Bacillales</i> >               |    |             |           |     |
|-----------------------------------------------|----|-------------|-----------|-----|
|                                               | DF | Chi-Squared | P value   |     |
| Day                                           | 1  | 0.64103     | 0.4233    |     |
| Treatment: Day 1                              | 1  | 1.1905      | 0.2752    |     |
| Treatment: Day 12                             | 1  | 3.8571      | 0.04953   | *   |
| < Trial 2 - <i>Bacillales</i> >               |    |             |           |     |
|                                               | DF | Chi-Squared | P value   |     |
| Day                                           | 1  | 0.23077     | 0.631     |     |
| Treatment: Day 1                              | 1  | 0.42857     | 0.5127    |     |
| Treatment: Day 9                              | 1  | 3.8571      | 0.04953   | *   |
| < Trial 3 - <i>Bacillales</i> >               |    |             |           |     |
|                                               | DF | Chi-Squared | P value   |     |
| Day                                           | 2  | 0.94737     | 0.6227    |     |
| Treatment: All                                | 1  | 12.789      | 0.0003486 | *** |
| Treatment: Day 5                              | 1  | 3.8571      | 0.04953   | *   |
| Treatment: Day 8                              | 1  | 3.8571      | 0.04953   | *   |
| Treatment: Day 12                             | 1  | 3.8571      | 0.04953   | *   |
| < Trial 3 - <i>Bacillales</i> Days 5 and 8 >  |    |             |           |     |
|                                               | DF | Chi-Squared | P value   |     |
| Day                                           | 1  | 3.8571      | 0.04953   | *   |
| < Trial 3 - <i>Bacillales</i> Days 5 and 12 > |    |             |           |     |
|                                               | DF | Chi-Squared | P value   |     |
| Day                                           | 1  | 3.8571      | 0.04953   | *   |
| < Trial 3 - <i>Bacillales</i> Days 8 and 12 > |    |             |           |     |
|                                               | DF | Chi-Squared | P value   |     |
| Day                                           | 1  | 3.8571      | 0.04953   | *   |

**Supplementary Table 8.** Kruskal-Wallis Rank Sum Test for relative percent abundance of *Oceanospirillales* reads in water samples per Trial by Day and Treatment Group.

| < Trial 1 - <i>Oceanospirillales</i> >               |    |             |          |    |
|------------------------------------------------------|----|-------------|----------|----|
|                                                      | DF | Chi-Squared | P value  |    |
| Day                                                  | 1  | 8.3077      | 0.003948 | ** |
| Treatment: Day 1                                     | 1  | 3.8571      | 0.04953  | *  |
| Treatment: Day 12                                    | 1  | 3.8571      | 0.04953  | *  |
| < Trial 2 - <i>Oceanospirillales</i> >               |    |             |          |    |
|                                                      | DF | Chi-Squared | P value  |    |
| Day                                                  | 1  | 5.7692      | 0.01631  | *  |
| Treatment: Day 1                                     | 1  | 3.8571      | 0.04953  | *  |
| Treatment: Day 9                                     | 1  | 1.1905      | 0.2752   |    |
| < Trial 3 - <i>Oceanospirillales</i> >               |    |             |          |    |
|                                                      | DF | Chi-Squared | P value  |    |
| Day                                                  | 2  | 8.2222      | 0.01639  | *  |
| Treatment: Day 5                                     | 1  | 3.8571      | 0.04953  | *  |
| Treatment: Day 8                                     | 1  | 3.8571      | 0.04953  | *  |
| Treatment: Day 12                                    | 1  | 3.8571      | 0.04953  | *  |
| < Trial 3 - <i>Oceanospirillales</i> Days 5 and 8 >  |    |             |          |    |
|                                                      | DF | Chi-Squared | P value  |    |
| Day                                                  | 1  | 4.3333      | 0.03737  | *  |
| < Trial 3 - <i>Oceanospirillales</i> Days 5 and 12 > |    |             |          |    |
|                                                      | DF | Chi-Squared | P value  |    |
| Day                                                  | 1  | 1.2564      | 0.2623   |    |
| < Trial 3 - <i>Oceanospirillales</i> Days 8 and 12 > |    |             |          |    |
|                                                      | DF | Chi-Squared | P value  |    |
| Day                                                  | 1  | 6.5641      | 0.01041  | *  |



**Supplementary Table 9.** Kruskal-Wallis Rank Sum Test for Simpson's Index of Diversity of *Vibrionales* relative percent reads in Trial 1 per Sample Type by Day and Treatment Group.

| < Trial 1 All Samples – <i>Vibrio</i> diversity >   |    |             |          |    |
|-----------------------------------------------------|----|-------------|----------|----|
|                                                     | DF | Chi-Squared | P value  |    |
| Type                                                | 2  | 8.4324      | 0.01475  | *  |
| Day                                                 | 2  | 10.89       | 0.004318 | ** |
| Treatment                                           | 1  | 0.25626     | 0.6127   |    |
| < Trial 1 Oyster Larvae – <i>Vibrio</i> diversity > |    |             |          |    |
|                                                     | DF | Chi-Squared | P value  |    |
| Day                                                 | 1  | 0           | 1        |    |
| Treatment                                           | 1  | 0.41026     | 0.5218   |    |
| < Trial 1 Biofilm swab – <i>Vibrio</i> diversity >  |    |             |          |    |
|                                                     | DF | Chi-Squared | P value  |    |
| Day                                                 | 1  | 8.3077      | 0.003948 | ** |
| Treatment                                           | 1  | 0.025641    | 0.8728   |    |
| < Trial 1 Water – <i>Vibrio</i> diversity >         |    |             |          |    |
|                                                     | DF | Chi-Squared | P value  |    |
| Day                                                 | 1  | 8.3077      | 0.003948 | ** |
| Treatment                                           | 1  | 0.64193     | 0.4233   |    |
| Treatment –<br>Day 12                               | 1  | 3.8571      | 0.04953  | *  |

**Supplementary Table 10.** Kruskal-Wallis Rank Sum Test for relative percent abundance of *Vibrionales* reads in Trial 1 per Sample Type by Day and Treatment Group.

| < Trial 1 All Samples – <i>Vibrio</i> percent abundance >   |    |             |           |     |
|-------------------------------------------------------------|----|-------------|-----------|-----|
|                                                             | DF | Chi-Squared | P value   |     |
| Type                                                        | 2  | 16.722      | 0.0002338 | *** |
| Day                                                         | 2  | 22.651      | 1.206e-05 | *** |
| Treatment                                                   | 1  | 0.0009009   | 0.9244    |     |
| < Trial 1 Oyster Larvae – <i>Vibrio</i> percent abundance > |    |             |           |     |
|                                                             | DF | Chi-Squared | P value   |     |
| Day                                                         | 1  | 8.3077      | 0.003948  | **  |
| Treatment                                                   | 1  | 0.10256     | 0.7488    |     |
| < Trial 1 Biofilm swab – <i>Vibrio</i> percent abundance >  |    |             |           |     |
|                                                             | DF | Chi-Squared | P value   |     |
| Day                                                         | 1  | 8.3077      | 0.003948  | **  |
| Treatment                                                   | 1  | 0           | 1         |     |
| < Trial 1 Water – <i>Vibrio</i> percent abundance >         |    |             |           |     |
|                                                             | DF | Chi-Squared | P value   |     |
| Day                                                         | 1  | 8.3077      | 0.003948  | **  |
| Treatment                                                   | 1  | 0.025641    | 0.8728    |     |

**Supplementary Table 11.** Kruskal-Wallis Rank Sum Test for culturable *Vibrio* colony counts in Trial 1 per Sample Type by Day and Treatment Group.

| < Trial 1 All Samples – <i>Vibrio</i> colony counts >   |    |             |          |    |
|---------------------------------------------------------|----|-------------|----------|----|
|                                                         | DF | Chi-Squared | P value  |    |
| Type                                                    | 2  | 2.4254      | 0.2974   |    |
| Day                                                     | 2  | 2.4406      | 0.2951   |    |
| Treatment                                               | 1  | 10.234      | 0.001379 | ** |
| < Trial 1 Oyster Larvae – <i>Vibrio</i> colony counts > |    |             |          |    |
|                                                         | DF | Chi-Squared | P value  |    |
| Day                                                     | 1  | 3.7053      | 0.05424  |    |
| Treatment                                               | 1  | 1.8591      | 0.1727   |    |
| < Trial 1 Biofilm swab – <i>Vibrio</i> colony counts >  |    |             |          |    |
|                                                         | DF | Chi-Squared | P value  |    |
| Day                                                     | 1  | 2.0769      | 0.1495   |    |
| Treatment                                               | 1  | 3.1026      | 0.07817  |    |
| < Trial 1 Water – <i>Vibrio</i> colony counts >         |    |             |          |    |
|                                                         | DF | Chi-Squared | P value  |    |
| Day                                                     | 1  | 2.0989      | 0.1474   |    |
| Control by Day                                          | 1  | 3.9706      | 0.0463   | *  |
| Treated by Day                                          | 1  | 4.0909      | 0.04311  | *  |
| Treatment                                               | 1  | 8.3958      | 0.003761 | ** |
